# Supplementary material for: Magnitude of Biofilm Formation and Antimicrobial Resistance Pattern of Bacteria Isolated from Urinary Catheterized Inpatients of Jimma University Medical Center, Southwest Ethiopia
Source: Hindawi journal article supplement (doi:10.1155/2019/5729568), 2019-02-10
Supplement: f1 [file 5729568.f1.pdf]

**Supplementary Table 1: Distribution of biofilm formation pattern bacteria with respect clinical profiles of inpatients of JUMC, southwest Ethiopia; February - August, 2016.**

| variables                               | Biofilm formation pattern |         |          |         | $\chi^2$ | P -value |
|-----------------------------------------|---------------------------|---------|----------|---------|----------|----------|
|                                         | SBF (%)                   | MBF (%) | WBF (%)  | NBF (%) |          |          |
| <b>Primary diagnosis upon admission</b> |                           |         |          |         |          |          |
| Uro-genital abnormality                 | 15(34.9)                  | 7(16.3) | 14(32.6) | 7(16.3) | 9.87     | 0.627    |
| Leg or head injury                      | 2(50)                     | 1(25)   | 0(0)     | 1(25)   |          |          |
| Malignancy                              | 1(25)                     | 1(25)   | 0(0)     | 2(50)   |          |          |
| Appendicitis/bowel obstruction          | 0                         | 0       | 1(100)   | 0       |          |          |
| Chronic heart failure                   | 1(50)                     | 0       | 0        | 1(50)   |          |          |
| <b>Presence of underlying illness</b>   |                           |         |          |         |          |          |
| Yes                                     | 10(43.5)                  | 3(13.0) | 4(17.4)  | 6(26.1) | 3.29     | 0.348    |
| No                                      | 9(29)                     | 6(19.4) | 11(35.5) | 5(16.1) |          |          |
| <b>Diabetes status</b>                  |                           |         |          |         |          |          |
| Diabetic                                | 3(37.5)                   | 2(25.0) | 1(12.5)  | 2(25)   | 1.94     | 0.731    |
| Non diabetic                            | 16(34.8)                  | 7(15.2) | 14(30.4) | 9(19.6) |          |          |
| <b>Antimicrobial drug received</b>      |                           |         |          |         |          |          |
| Yes                                     | 13(48.1)                  | 4(14.8) | 6(22.2)  | 4(14.8) | 4.10     | 0.250    |
| No                                      | 6(22.2)                   | 5(18.5) | 9(33.3)  | 7(25.9) |          |          |
| <b>Reason for catheterization</b>       |                           |         |          |         |          |          |
| Pre or post-operative drainage          | 10(43.5)                  | 4(17.4) | 5(21.7)  | 4(17.4) | 7.24     | 0.612    |
| Urine output measurement                | 1(25)                     | 0       | 2(50)    | 1(25)   |          |          |
| Incontinence                            | 4(36.4)                   | 1(9.1)  | 5(45.5)  | 1(9.1)  |          |          |

|                                         |                 |                |                 |                 |      |       |
|-----------------------------------------|-----------------|----------------|-----------------|-----------------|------|-------|
| Urinary retention                       | 4(25)           | 4(25)          | 3(18.8)         | 5(31.2)         |      |       |
| <b>Duration of catheterization /day</b> |                 |                |                 |                 |      |       |
| <4 days                                 | 4(30.8)         | 2(15.4)        | 5(38.5)         | 2(15.4)         |      |       |
| 4-6 days                                | 9(52.9)         | 2(11.8)        | 3(17.6)         | 3(17.6)         | 4.46 | 0.614 |
| ≥ 7 days                                | 6(25)           | 5(20.6)        | 7(29.2)         | 6(25)           |      |       |
| <b>Length of hospital stay/ day</b>     |                 |                |                 |                 |      |       |
| <10 days                                | 10(43.5)        | 1(4.3)         | 8(34.8)         | 4(17.4)         | 5.31 | 0.150 |
| ≥10 days                                | 9(29.0)         | 8(25.8)        | 7(22.6)         | 7(22.6)         |      |       |
| <b>Total</b>                            | <b>19(35.2)</b> | <b>9(16.7)</b> | <b>15(27.8)</b> | <b>11(20.4)</b> |      |       |
